# Supplementary material for: 3D printing of metal–organic framework incorporated porous scaffolds to promote osteogenic differentiation and bone regeneration
Source: Royal Society of Chemistry journal article supplement (doi:10.1039/d0nr06297a), 2020-01-01
Supplement: d0nr06297a1.pdf [file d0nr06297a1.pdf]

## Supplementary Information

### 3D printing of metal-organic framework incorporated porous scaffolds to promote osteogenic differentiation and bone regeneration

Linna Zhong<sup>a</sup>, Junyu Chen<sup>a</sup>, Zhiyong Ma<sup>b</sup>, Hao Feng<sup>a</sup>, Song Chen<sup>a</sup>, He Cai<sup>a</sup>, Yiyuan Xue<sup>a</sup>, Xibo Pei<sup>a</sup>, Jian Wang<sup>\*a</sup> and Qianbing Wan<sup>\*a</sup>

<sup>a</sup> State Key Laboratory of Oral Diseases, National Clinical Research Center for Oral Diseases, Department of Prosthodontics, West China Hospital of Stomatology, Sichuan University, Chengdu, 610041, Peoples R China

<sup>b</sup> School of Engineering, Huzhou University, Huzhou 313000, Peoples R China

\* Corresponding author:

Jian Wang; e-mail: ferowang@hotmail.com Tel: +86-28-85501450

Qianbing Wan; e-mail: champion@scu.edu.cn Tel: +86-28-85503671

Qianbing Wan and Jian Wang, Sichuan University, No. 14, Section 3, South Peoples Road, Chengdu 610041, China.

Table 1 Primer sequences of the genes involved in this study.

| Primer                 | Sequence ( 5' to 3')   |
|------------------------|------------------------|
| Rat- <i>Osx</i> -F     | GTCCTGGCAACACTCCTACC   |
| Rat- <i>Osx</i> -R     | GGGCAAAGTCAGACGGGTAA   |
| Rat- <i>ALP</i> -F     | CAACGTGGCCAAGAACATCA   |
| Rat- <i>ALP</i> -R     | CCTGAGCGTTGGTGTGTAC    |
| Rat- <i>Ocn</i> -F     | TTATTGTTTGAGGGGCCTGGG  |
| Rat- <i>Ocn</i> -R     | ACACAACCTGCAGGTCGAGTTT |
| Rat- <i>Opn</i> -F     | TCAAGGTCATCCCAGTTGCC   |
| Rat- <i>Opn</i> -R     | GACTCATGGCTGGTCTTCCC   |
| Rat- <i>β-actin</i> -F | CTCTGTGTGGATTGGTGGCT   |
| Rat- <i>β-actin</i> -R | CGCAGCTCAGTAACAGTCCG   |

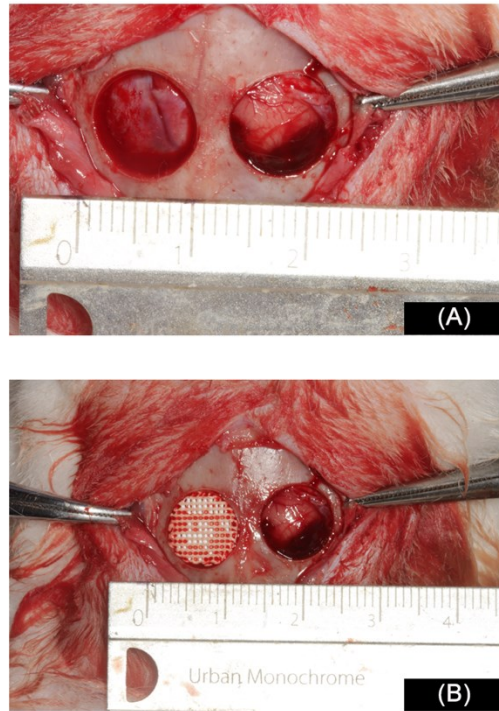

Figure S1. Photograph of implant surgery with calvarial defect model in rabbit. (A) Critical-sized defect model preparation; (B) Scaffolds implantation.

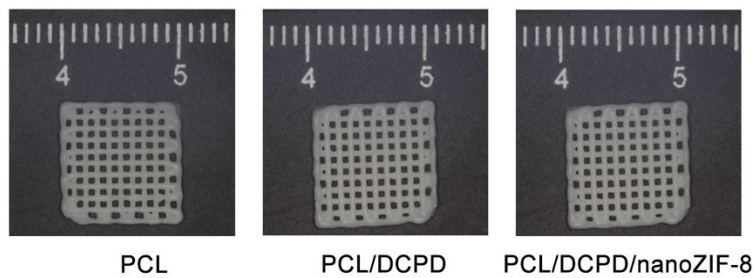

Figure S2. Macrograph images of the porous scaffolds by extrusion-based 3D printing technology.

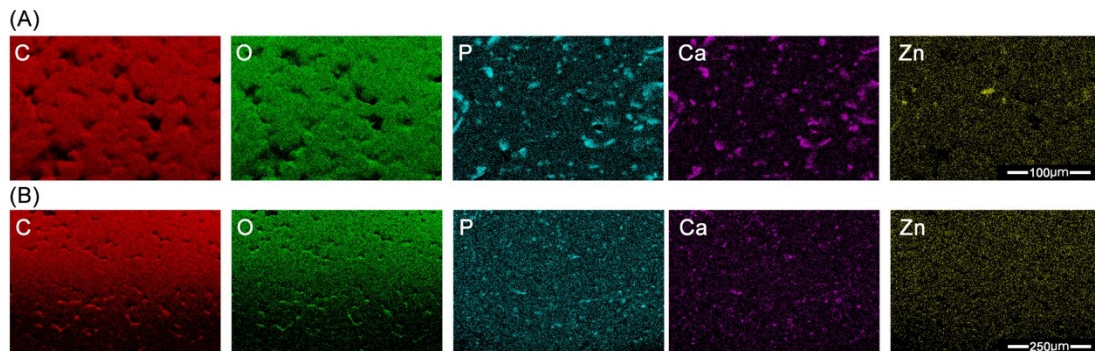

Figure S3. EDS-mapping for carbon, oxygen, phosphorus, calcium and zinc of PCL/DCPD/nanoZIF-8 porous composite scaffold before (A) and after (B) the immersion test.

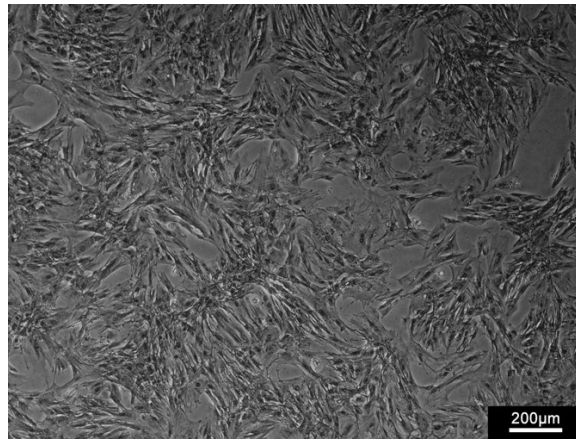

Figure S4. Representative images of BMSC observed under optical microscopy.

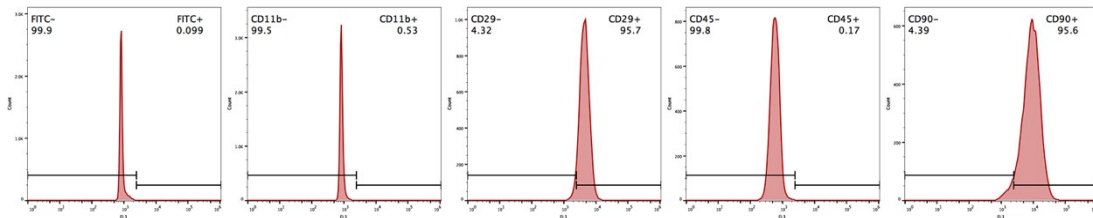

Figure S5. Representative flow cytometry dot plots showing cell surface markers of BMSC.

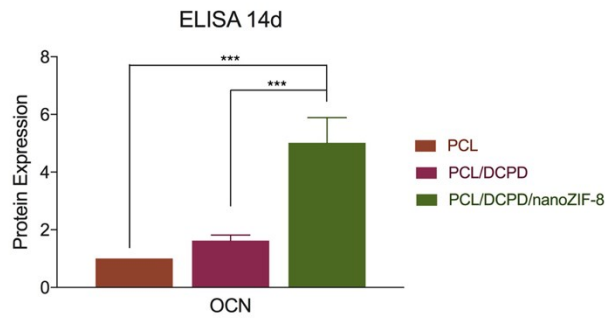

Figure S6. Protein expression of OCN in BMSCs at day 14 using ELISA kit. Data were shown as mean  $\pm$  SD, \*\*\*  $p < 0.001$ , (n=4).
